# Supplementary material
Source: PubMed Central journal article supplement (PMC4113727)
Supplement: NIHMS577361-supplement-05.pdf [file NIHMS577361-supplement-05.pdf]

**Table S1.** Numbers and genotype frequencies of embryos recovered from Sox9-IRES-Cre;*Efnb2*<sup>+/*LacZ*</sup>  
X *Efnb2*<sup>fl<sup>ox</sup>/fl<sup>ox</sup></sup> matings

| Gestational day at collection | No. of litters | <i>Efnb2</i> <sup>+/<i>fl<sup>ox</sup></i></sup> | <i>Efnb2</i> <sup><i>LacZ</i>/<i>fl<sup>ox</sup></i></sup> | Sox9-IRES-Cre <sup>+</sup> ; <i>Efnb2</i> <sup>+/<i>fl<sup>ox</sup></i></sup> | Sox9-IRES-Cre <sup>+</sup> ; <i>Efnb2</i> <sup><i>LacZ</i>/<i>fl<sup>ox</sup></i></sup> | Totals |
|-------------------------------|----------------|--------------------------------------------------|------------------------------------------------------------|-------------------------------------------------------------------------------|-----------------------------------------------------------------------------------------|--------|
| E9.5/10.5/11.5                | 14             | 41<br>(.30)                                      | 30<br>(.22)                                                | 27<br>(.20)                                                                   | 37<br>(.27)                                                                             | 135    |
| E12.5/13.5/14.5               | 33             | 72<br>(.29)                                      | 75<br>(.30)                                                | 71<br>(.28)                                                                   | 33 *<br>(.13)                                                                           | 251    |
| E15.5/16.5/19                 | 35             | 81<br>(.27)                                      | 95<br>(.32)                                                | 83<br>(.28)                                                                   | 42 *<br>(.14)                                                                           | 301    |
| Totals                        | 82             | 194<br>(.28)                                     | 200<br>(.29)                                               | 181<br>(.26)                                                                  | 112 **<br>(.16)                                                                         | 687    |

Absolute numbers and genotype frequencies (in parentheses) are shown. P values for Chi-square tests are: \* P < 0.01; and \*\*P < 0.001.
